# Supplementary material for: Cobalt-doping in hierarchical Ni3S2 nanorod arrays enables high areal capacitance
Source: Royal Society of Chemistry journal article supplement (doi:10.1039/d0ta04483k), 2020-01-01
Supplement: d0ta04483k1.pdf [file d0ta04483k1.pdf]

Electronic Supplementary Information

**Cobalt-doping in Hierarchical Ni<sub>3</sub>S<sub>2</sub> Nanorod Arrays Enables High Areal Capacitance**

Qiang Chen,<sup>a, b, ‡</sup> Jialun Jin,<sup>a, ‡</sup> Zongkui Kou,<sup>b</sup> Jiangmin Jiang,<sup>b</sup> YuluFu,<sup>a, b</sup> Ziang Liu,<sup>a</sup>

Liang Zhou,<sup>a, c \*</sup> and Liqiang Mai<sup>a, c</sup>

<sup>a</sup>State Key Laboratory of Advanced Technology for Materials Synthesis and Processing, Wuhan University of Technology, Wuhan 430070, China.

<sup>b</sup>Department of Materials Science and Engineering, National University of Singapore, Singapore 117574, Singapore.

<sup>c</sup>Foshan Xianhu Laboratory, Foshan 528216, Guangdong, China

E-mail: liangzhou@whut.edu.cn (L. Zhou).

<sup>‡</sup> These authors contribute equally to this work.

**Calculations:**

**1. Co-Ni<sub>3</sub>S<sub>2</sub> Electrode:**

The areal capacitances of electrodes were measured by galvanostatic charge/discharge method according to the following equation:

$$C_a = \frac{I \times \Delta t}{\Delta V \cdot S} \quad (1)$$

where  $C_a$  (F cm<sup>-2</sup>) is the areal capacitance,  $I$  (A) is the constant discharging current,  $\Delta t$  is the discharging time,  $\Delta V$  (V) is the potential window, and  $S$  (cm<sup>2</sup>) is the surface area.

## 2. Co-Ni<sub>3</sub>S<sub>2</sub>//FeOOH HSCs:

The areal capacitance ( $C_s$ ) of the Co-Ni<sub>3</sub>S<sub>2</sub>//FeOOH HSCs was calculated from the slope of the discharge curve using the following equations:

$$C_s = \frac{I \times \Delta t}{S \times \Delta V} \quad (2)$$

where  $C_s$  (F cm<sup>-2</sup>) is the areal capacitance,  $I$  (A) is the applied current,  $S$  (cm<sup>2</sup>) is the volume of the whole device (The area and thickness of the Co-Ni<sub>3</sub>S<sub>2</sub>//FeOOH HSCs device are about 0.5 cm<sup>2</sup> and 0.1 cm, respectively),  $\Delta t$  (s) is the discharging time,  $\Delta V$  (V) is the voltage window. It is worth mentioning that the volumetric capacitances were calculated based on the volume of the whole device. This includes the volume of electrode and the separator with electrolyte.

The time constant was calculated from the following equation:

$$\tau_0 = 1/f_0 \quad (3)$$

where  $\tau_0$  (s) is the time constant,  $f_0$  (Hz) is the characteristic frequency at the phase angle of -45° .

Areal energy density, equivalent series resistance and power density of the devices

were obtained from the following equations:

$$E = \frac{1}{3600 \times 2} C_s \times \Delta V^2 \quad (4)$$

$$P = \frac{3600E}{\Delta t} \quad (5)$$

where  $E$  (Wh cm<sup>-2</sup>) is the energy density,  $C_s$  is the volumetric capacitance obtained from Equation (2) and  $\Delta V$  (V) is the voltage window.  $P$  (W cm<sup>-2</sup>) is the power density.

### 3. Balance the charge of electrodes in HSCs device:

As for a SC, the charge balance will follow the relationship  $q^+ = q^-$ . The charge stored by each electrode depends on the capacitance ( $C_s$ ), the potential range for the charge/discharge process ( $\Delta E$ ) and the area of the electrode ( $A$ ). It follows the Equation (6):

$$q = C_s \times \Delta E \times m \quad (6)$$

In order to get  $q^+ = q^-$  at 100 mV s<sup>-1</sup>, the area balancing between Co-Ni<sub>3</sub>S<sub>2</sub> and FeOOH electrode will be calculated as follow (7):

$$\frac{A_{Co-Ni_3S_2}}{A_{FeOOH}} = \frac{C_{A(FeOOH)} \times \Delta E_{(FeOOH)}}{C_{A(Co-Ni_3S_2)}} \approx \frac{1.2}{1} \quad (7)$$

The calculated  $C_{A(FeOOH)}$  is 0.58 F cm<sup>-2</sup>,  $\Delta E_{(FeOOH)}$  is 1.2 V,  $C_{A(Co-Ni_3S_2)}$  is 0.57 F cm<sup>-2</sup>.

Therefore, the calculated areal ratio between the Co-Ni<sub>3</sub>S<sub>2</sub> electrode and FeOOH electrode is about 1.2 : 1.

**The electrochemical active surface area (ECSA) measurement:** The capacitive current was used to determine the ECSA of the as-prepared  $\text{Ni}_3\text{S}_2$  and  $\text{Co-Ni}_3\text{S}_2$  with a scan window of 0.4 to 0.5 V vs. SCE. The current density differences at 0.45 V against the scan rate (4 to 16  $\text{mV s}^{-1}$ ) were fitted to obtain the double-layer capacitance ( $C_{\text{dl}}$ ) and ECSA.

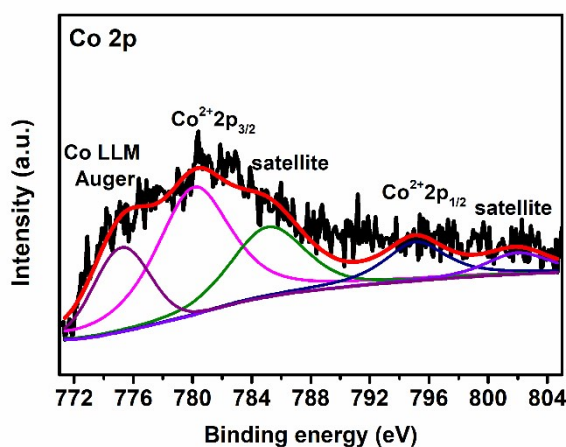

**Fig. S1** Co 2p XPS spectrum of the  $\text{Co-Ni}_3\text{S}_2$ .

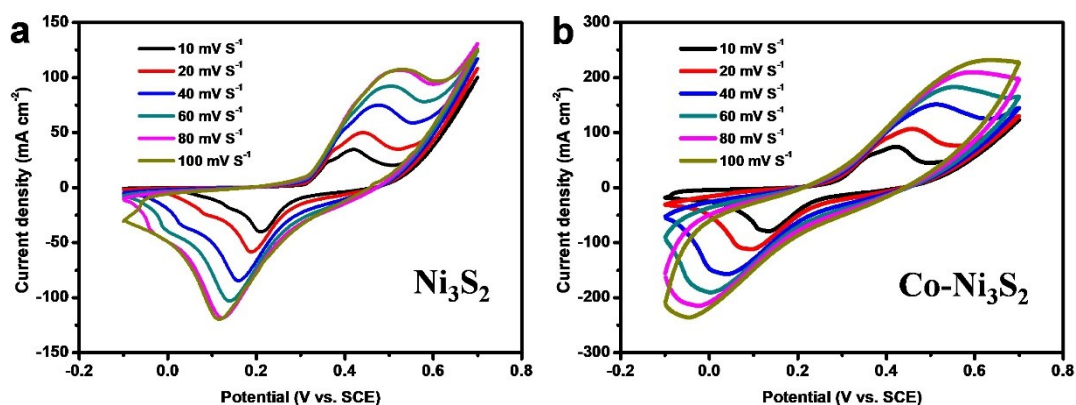

**Fig. S2** CV curves of the (a)  $\text{Ni}_3\text{S}_2$  and (b)  $\text{Co-Ni}_3\text{S}_2$  at different scan rate.

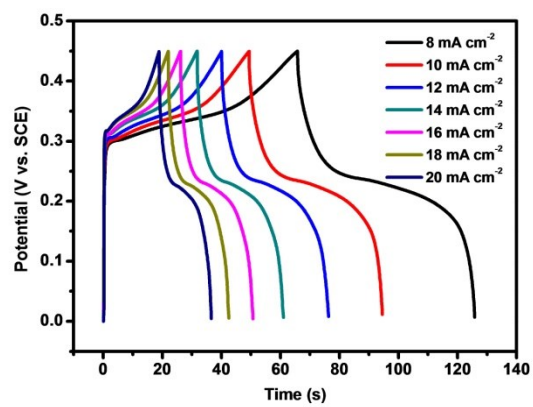

**Fig. S3** GCD curves of the  $\text{Ni}_3\text{S}_2$  nanosheets at different current densities.

**Table S1.** Comparison of the capacitance of Co-Ni<sub>3</sub>S<sub>2</sub> nanorods with recently reported state-of-the-art supercapacitor electrode materials.

| Electrode                                                        | Morphology        | Current density )<br>[mAcm <sup>-2</sup> ] | CP areal capacitance<br>[Fcm <sup>-2</sup> ] | Scan rate<br>[mVs <sup>-1</sup> ] | CV areal capacitance<br>[Fcm <sup>-2</sup> ] | Substrate | Electrolyte      | Reference        |
|------------------------------------------------------------------|-------------------|--------------------------------------------|----------------------------------------------|-----------------------------------|----------------------------------------------|-----------|------------------|------------------|
| <b>Co-Ni<sub>3</sub>S<sub>2</sub><sup>a)</sup></b>               | <b>nanorods</b>   | <b>8</b>                                   | <b>3.46</b>                                  | <b>10</b>                         | <b>1.81</b>                                  | <b>NF</b> | <b>1.0 M KOH</b> | <b>This work</b> |
| <b>Ni<sub>3</sub>S<sub>2</sub><sup>a)</sup></b>                  | <b>nanosheets</b> | <b>8</b>                                   | <b>1.07</b>                                  | <b>10</b>                         | <b>0.74</b>                                  | <b>NF</b> | <b>1.0 M KOH</b> | <b>This work</b> |
| Ni <sub>3</sub> S <sub>2</sub> @CdS <sup>a)</sup>                | nanorods          | 8                                          | 2.92                                         | N.A.                              | N.A.                                         | NF        | 3.0 M KOH        | S1 <sup>1</sup>  |
| NiCo <sub>2</sub> O <sub>4</sub> @MnO <sub>2</sub> <sup>a)</sup> | nanowires         | 8                                          | 1.91                                         | N.A.                              | N.A.                                         | NF        | 1.0 M NaOH       | S2 <sup>2</sup>  |
| Ni <sub>3</sub> S <sub>2</sub> @β-NiS <sup>c)</sup>              | nanosheets        | 8                                          | 2.48                                         | N.A.                              | N.A.                                         | NF        | 6.0 M KOH        | S3 <sup>3</sup>  |
| Activated NF <sup>a)</sup>                                       | thin film         | 8                                          | 2.04                                         | N.A.                              | N.A.                                         | NF        | 6.0 M KOH        | S4 <sup>4</sup>  |
| Co <sub>3</sub> O <sub>4</sub> @C@Ni <sub>3</sub> S <sub>2</sub> | nanoneedle        | 10                                         | 2.25                                         | N.A.                              | N.A.                                         | NF        | 3.0 M KOH        | S5 <sup>5</sup>  |
| NF@NiO <sup>a)</sup>                                             | nanosheets        | 8                                          | 2.01                                         | 10                                | 1.3                                          | NF        | 1.0 M KOH        | S6 <sup>6</sup>  |
| NiCo-O <sup>a)</sup>                                             | nanowires         | 5                                          | 2.20                                         | N.A.                              | N.A.                                         | NF        | 1.0 M KOH        | S7 <sup>7</sup>  |
| Ni-Co-S <sup>b)</sup>                                            | nanosheets        | 8                                          | 1.08                                         | N.A.                              | N.A.                                         | CC        | 1.0 M KOH        | S8 <sup>8</sup>  |

<sup>a)</sup>vs SCE; <sup>b)</sup>vs Ag/AgCl; <sup>c)</sup> vs Hg/Hg

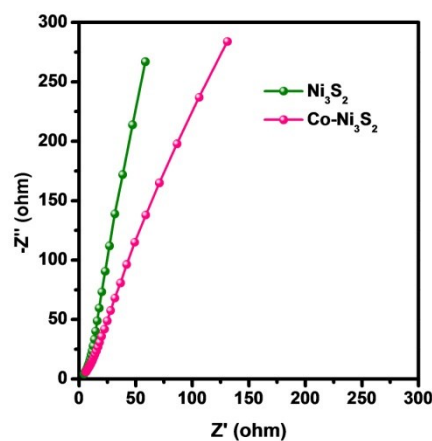

**Fig. S4** Nyquist plots of Ni<sub>3</sub>S<sub>2</sub> and Co-Ni<sub>3</sub>S<sub>2</sub>.

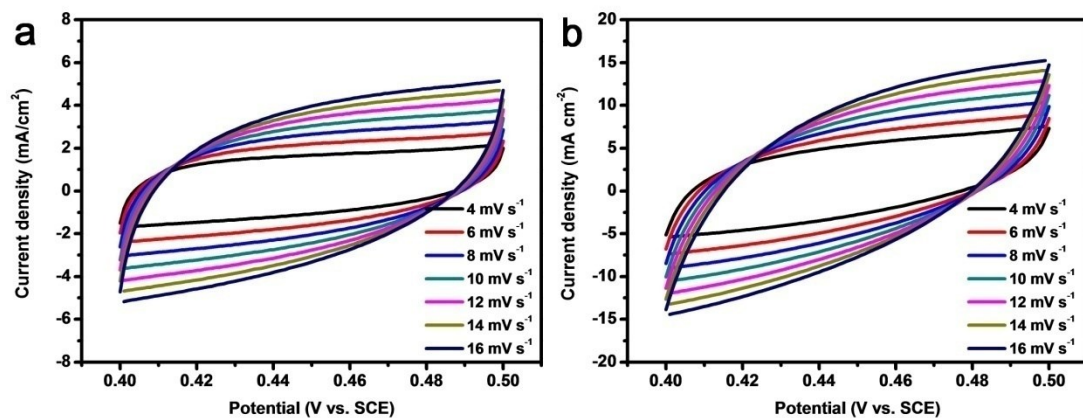

**Fig. S5** CV curves in the double layer region at scan rate of 4, 6, 8 10, 12, 14, 16 mV s<sup>-1</sup> of (a) Ni<sub>3</sub>S<sub>2</sub> and (b) Co-Ni<sub>3</sub>S<sub>2</sub>.

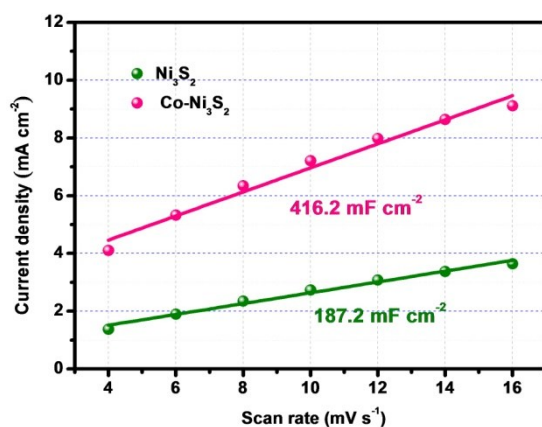

**Fig.S6** Current density as a function of scan rate for Ni<sub>3</sub>S<sub>2</sub> and Co-Ni<sub>3</sub>S<sub>2</sub>.

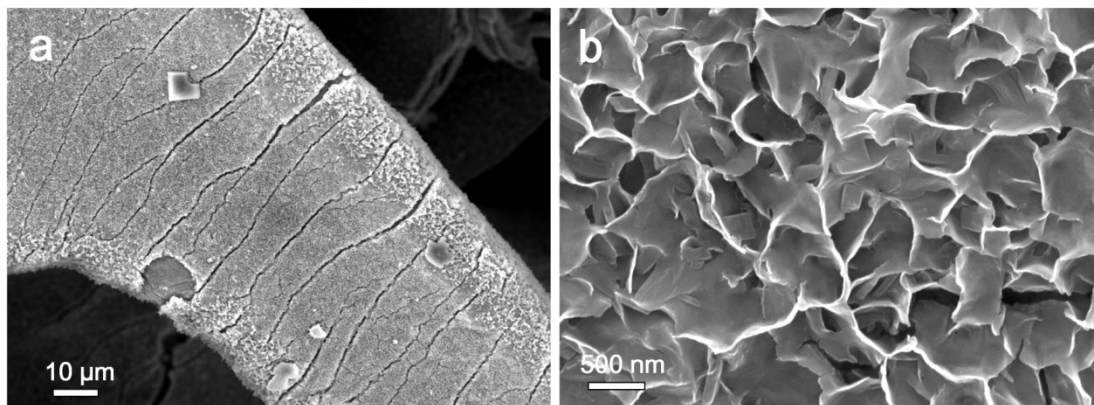

**Fig. S7** SEM images of  $\text{Ni}_3\text{S}_2$  electrode after 10 000 cycles in three-electrode system.

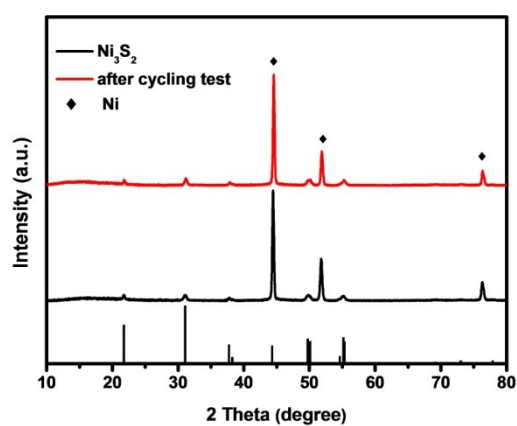

**Fig. S8** XRD pattern of the  $\text{Ni}_3\text{S}_2$  electrode before and after 10 000 cycles in three-electrode system.

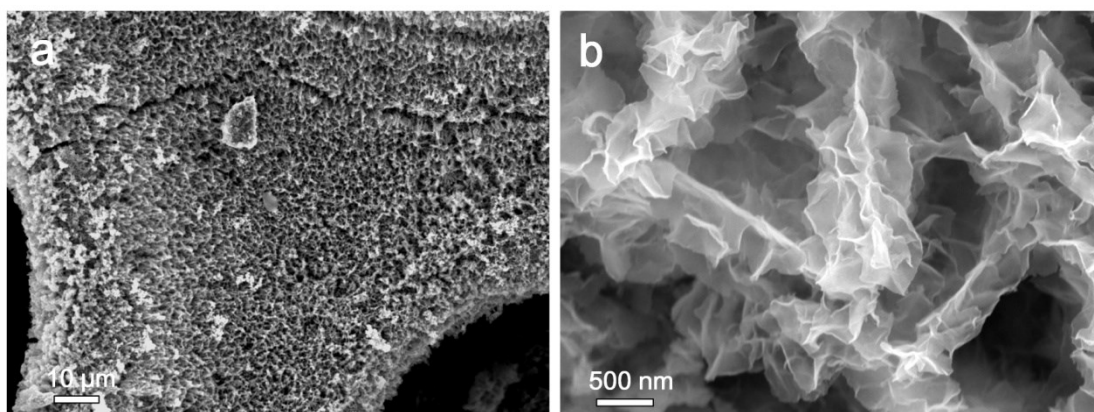

**Fig. S9** SEM images of  $\text{Co-Ni}_3\text{S}_2$  electrode after 10 000 cycles in three-electrode system.



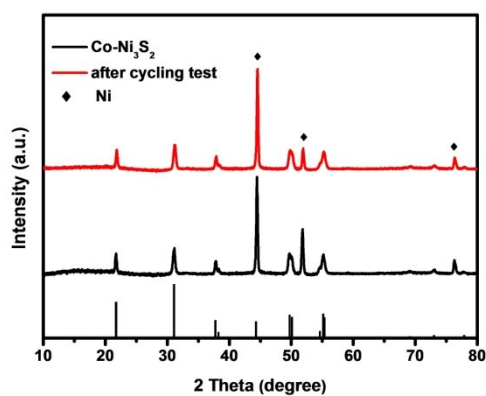

**Fig. S10** XRD pattern of Co-Ni<sub>3</sub>S<sub>2</sub> electrode before and after 10 000 cycles in three-electrode system.

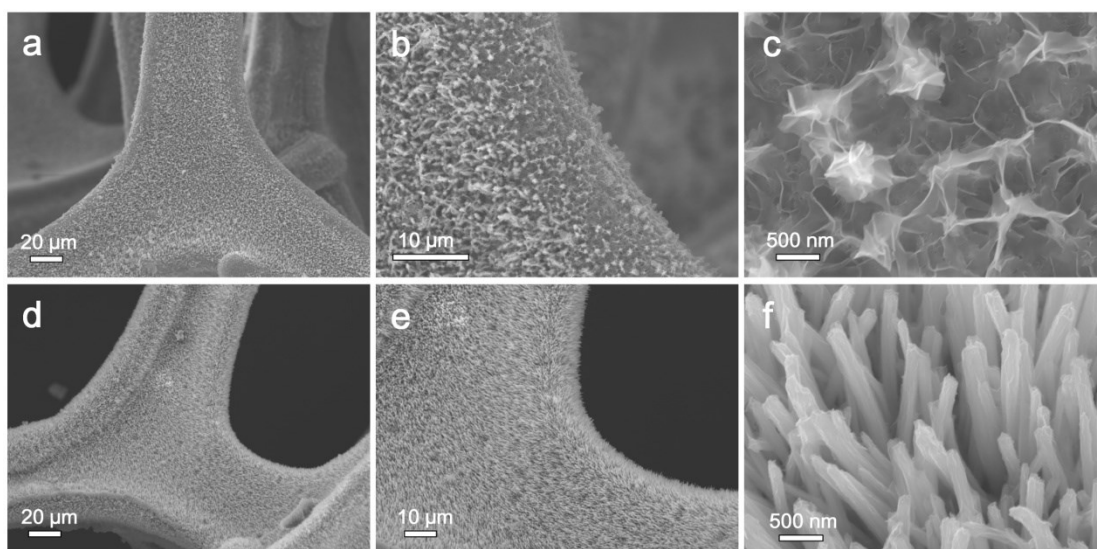

**Fig. S11** SEM images of Co-Ni<sub>3</sub>S<sub>2</sub> with different cobalt nitrate feeding amounts. (a-c) Co-Ni<sub>3</sub>S<sub>2</sub>-L; (d-f) Co-Ni<sub>3</sub>S<sub>2</sub>-H.

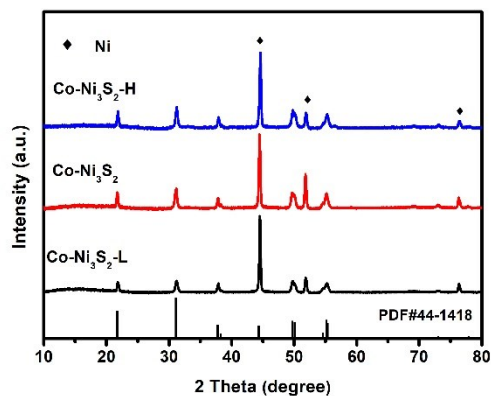

**Fig. S12** XRD pattern of the Co-Ni<sub>3</sub>S<sub>2</sub> with different cobalt nitrate feeding amounts.

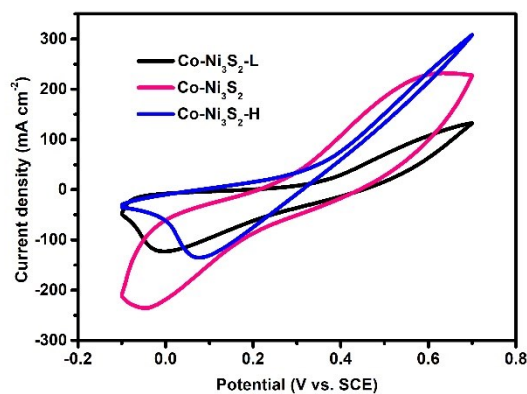

**Fig. S13** CV curves of the Co-Ni<sub>3</sub>S<sub>2</sub> with different cobalt nitrate feeding amount at a scan rate of 100 mV s<sup>-1</sup>.

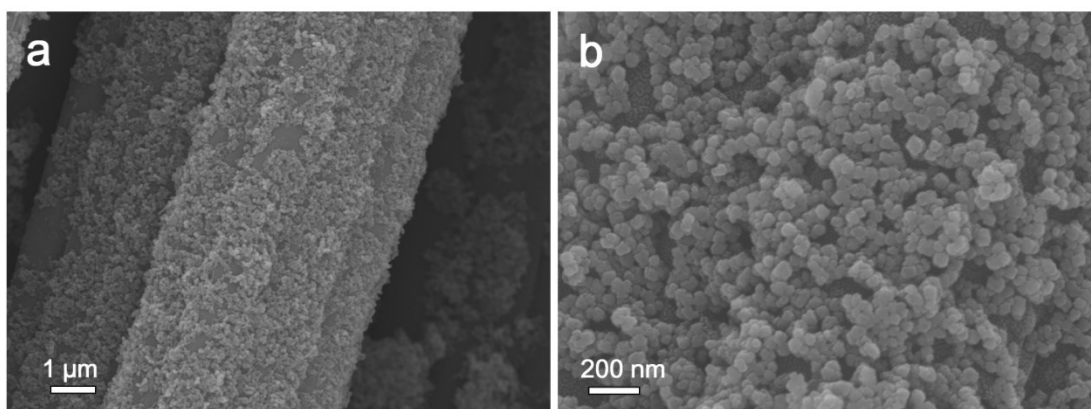

**Fig. S14** SEM images of FeOOH nanoparticles at different magnification.

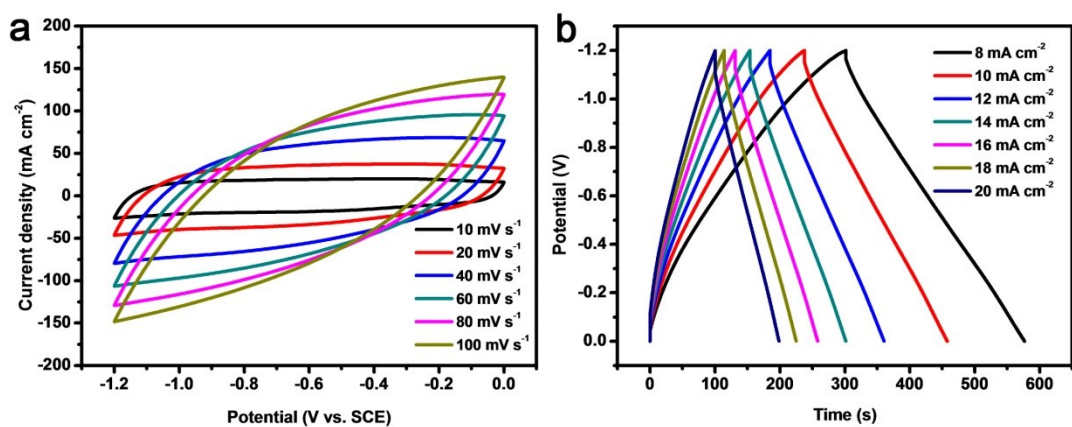

**Fig. S15** Electrochemical performances of the FeOOH electrode. (a) CV curves collected at various scan rates, and (b) GCD curves collected at different current densities.

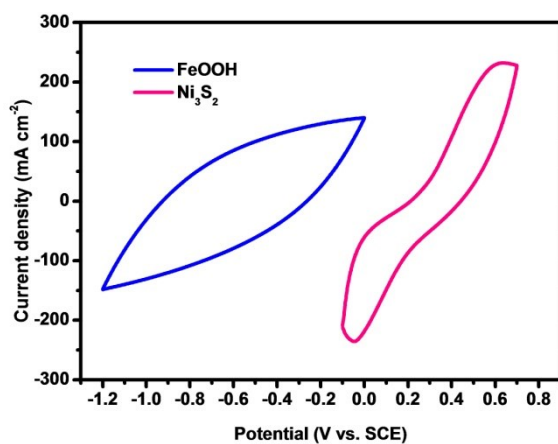

**Fig. S16** CV curves of FeOOH and  $\text{Co-Ni}_3\text{S}_2$  electrodes collected at  $100 \text{ mV s}^{-1}$ .

**Table S2.** Comparison of the electrochemical performances of Co-Ni<sub>3</sub>S<sub>2</sub>//FeOOH HSCs with recently reported state-of-the-art supercapacitors.

| Electrode                                                             | Morphology      | Current density )<br>[mAcm <sup>-2</sup> ] | CP areal capacitance<br>[Fcm <sup>-2</sup> ] | Substrate | Electrolyte      | Reference        |
|-----------------------------------------------------------------------|-----------------|--------------------------------------------|----------------------------------------------|-----------|------------------|------------------|
| <b>Co-Ni<sub>3</sub>S<sub>2</sub>//FeOOH</b>                          | <b>nanorods</b> | <b>10</b>                                  | <b>1.61</b>                                  | <b>NF</b> | <b>1.0 M KOH</b> | <b>This work</b> |
| Ni <sub>3</sub> S <sub>2</sub> @CdS//C                                | nanorods        | 8                                          | 0.60                                         | NF        | 3.0 M KOH        | S1 <sup>1</sup>  |
| Ni <sub>3</sub> S <sub>2</sub> @β-NiS//AC <sup>c)</sup>               | nanosheet       | 4                                          | 0.08                                         | NF        | 6.0 M KOH        | S3 <sup>3</sup>  |
| Co <sub>3</sub> O <sub>4</sub> @C@Ni <sub>3</sub> S <sub>2</sub> //AC | nanoneedle      | 20                                         | 0.327                                        | NF        | 3.0 M KOH        | S5 <sup>5</sup>  |
| NF@NiO//FeOOH                                                         | nanosheet       | 8                                          | 0.527                                        | NF        | 1.0 M KOH        | S6 <sup>6</sup>  |
| Ni-Co-O//AC                                                           | nanosheet       | 15                                         | 0.517                                        | NF        | 3.0 M KOH        | S7 <sup>7</sup>  |
| Ni-Co-S//graphene                                                     | nanosheet       | 1.6                                        | 0.263                                        | NF        | 1.0 M KOH        | S8 <sup>8</sup>  |

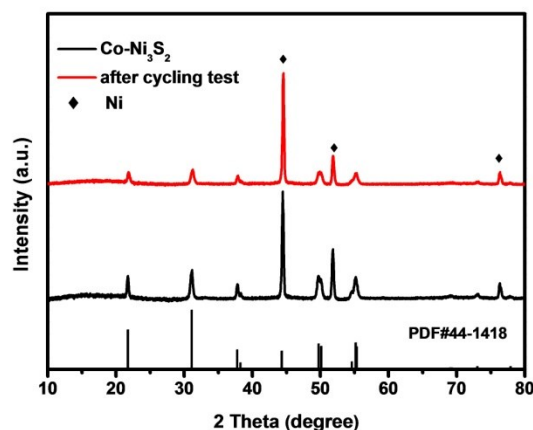

**Fig. S17** XRD patterns of the Co-Ni<sub>3</sub>S<sub>2</sub> electrode before and after 5 000 cycles in Co-Ni<sub>3</sub>S<sub>2</sub>//FeOOH HCSs.

## Reference

1. X. Wang, B. Shi, Y. Fang, F. Rong, F. Huang, R. Que and M. Shao, *J. Mater. Chem. A*, 2017, **5**, 7165-7172.
2. N. Wang, X. Ma, H. Xu, L. Chen, J. Yue, F. Niu, J. Yang and Y. Qian, *Nano Energy*, 2014, **6**, 193-199.
3. H. Huo, Y. Zhao and C. Xu, *J. Mater. Chem. A*, 2014, **2**, 15111-15117.
4. M. Yu, W. Wang, C. Li, T. Zhai, X. Lu and Y. Tong, *NPG Asia Mater*, 2014, **6**, e129.
5. D. Kong, C. Cheng, Y. Wang, J. I. Wong, Y. Yang and H. Y. Yang, *J. Mater. Chem. A*, 2015, **3**, 16150-16161.
6. Q. Chen, J. Li, C. Liao, G. Hu, Y. Fu, K. A. Owusu, S. Shi, Z. Liu, L. Zhou and L. Mai, *J. Mater. Chem. A*, 2018, **6**, 19488-19494.
7. Y. Li, L. Cao, L. Qiao, M. Zhou, Y. Yang, P. Xiao and Y. Zhang, *J. Mater. Chem. A*, 2014, **2**, 6540-6548.
8. W. Chen, C. Xia and H. N. Alshareef, *ACS Nano*, 2014, **8**, 9531-9541.
